# Supplementary material for: Factors Associated With Non-Uptake of Implantable Cardioverter-Defibrillator (ICD) Among Eligible Patients at a Tertiary Hospital in Kenya
Source: PubMed Central journal article supplement (PMC11328684; doi:10.5334/gh.1346), 2024-08-16
Supplement: gh-19-1-1346-s1.pdf [file gh-19-1-1346-s1.pdf]

Supplementary file 1: Case Report Form

Section A. Participants' Demographic data

1. Study ID \_\_\_\_\_
2. Hospital Number \_\_\_\_\_
3. Participant's Date of Birth. \_\_\_\_\_  
(DD/MMM/YY)
4. Participant's gender:
  - i) Male
  - ii) Female
5. Participant's Ethnicity: Black.   
Asian   
Caucasian.   
Other
6. Residence: i) Rural   
ii) Urban

Section B. Clinical Data.

7. Primary cause of heart failure:
  - i. Ischemic CMP
  - ii. non-ischemic CMP
  - iii. Not known/information cannot be ascertained from the medical file.
8. Left Ventricle ejection fraction.
  - i. Baseline EF \_\_\_\_\_  
Date. \_\_\_\_\_
  - ii. Reassessment EF \_\_\_\_\_  
Date. \_\_\_\_\_
9. New York Heart Association class.
  - i). I
  - ii). II
  - iii). III
  - iv). IV
10. History of Syncope. Yes.  No.
11. Documented Ventricular arrhythmia. Yes.  No.
12. Other comorbid conditions present:
  - i. Diabetes mellitus.
  - ii. Hypertension.
  - iii. Cancer (please specify type)
  - iv. Previous stroke
  - v. CKD
  - vi. Dementia.
  - vii. Psychiatric illness.

13. Baseline ECG diagnosis

- i. sinus rhythm
- ii. Atrial fibrillation (any)
- iii. Paced rhythm
- iv. LBBB, if yes QRS duration
- v. RBBB, if yes QRS duration
- vi. Ventricular Premature Beats

Section C. ICD.

14. Documented ICD counselling/prescription. Yes  No

15. ICD in Situ: Yes  No

16. Date of ICD

Implantation.

(DD/MMM/YY)

17. Any complications related to ICD procedure. Yes  No

If yes, Tick appropriate.

- i). Bleeding from the incision site or a hematoma (Requiring intervention)
- ii). Pneumothorax
- iii). Mechanical
- vi). Infection
- v). Others  specify\_\_\_\_\_

Section D. System Data.

18. Primary Physician.

- i. General Cardiologist. Yes  No
- ii. Non-cardiology physician. Yes  No

19. Mode of ICD

payment.i). Cash paying.

ii). Insurance.

- a. Government (NHIF)
- b. Private

iii). Combined Cash and Insurance.

Section E. Reasons for refusal.

20. Documented reason for refusal. Yes  No

If yes, what was the reason? Tick applicable.

- i. Unable to pay for the device
- ii. Concerned of risks associated with the device
- iii. Fear of device procedure
- iv. Doesn't believe in benefit of ICD
- v. Cultural/Religious belief
- vi. Conflicting opinions from medical staff
- vii. Unknown
- viii. Others
